6. Wagner PD, Hedenstierna G, Bylin G, Lagerstrand L: Reproducibility of the multiple inert gas elimination technique. *J Appl Physiol* (1985) 1987; 62:1740–6
7. Dwyer RC, Fee JP, Howard PJ, Clarke RS: Arterial washin of halothane and isoflurane in young and elderly adult patients. *Br J Anaesth* 1991; 66:572–9
8. Landon MJ, Matson AM, Royston BD, Hewlett AM, White DC, Nunn JF: Components of the inspiratory-arterial isoflurane partial pressure difference. *Br J Anaesth* 1993; 70:605–11
9. Peyton PJ, Horriat M, Robinson GJ, Pierce R, Thompson BR: Magnitude of the second gas effect on arterial sevoflurane partial pressure. *ANESTHESIOLOGY* 2008; 108:381–7
10. Avram MJ: Presenting data *versus* predictions as basic scientific information: Target-controlled infusions *versus* microgram per kilogram per minutes. *ANESTHESIOLOGY* 2011; 114:723
11. Ruskin KJ, Shelley KH: Patent medicine and the “black box.” *Anesth Analg* 2005; 100:1361–2

## ANESTHESIOLOGY REFLECTIONS FROM THE WOOD LIBRARY-MUSEUM

### Picturing “Dr. Colton” at the Cooper Institute: His Honorific Doctorate

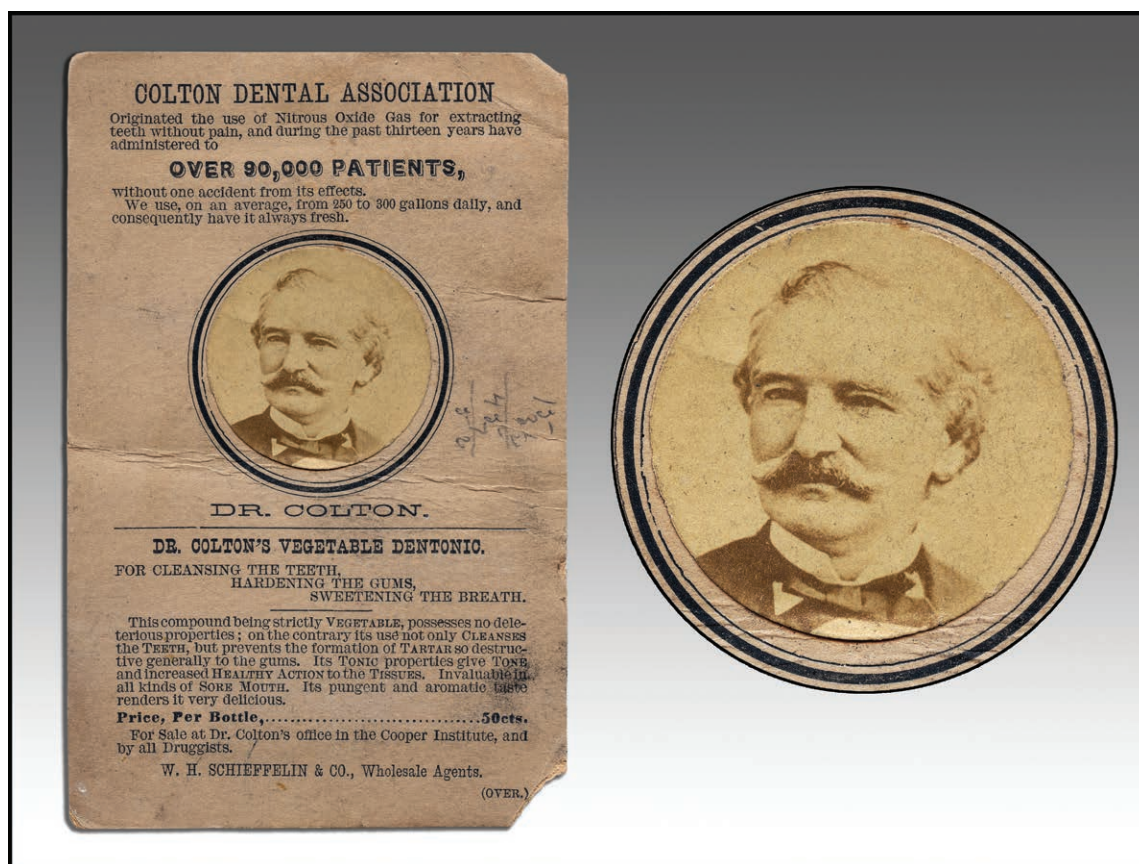

The reverse of this trade card (*left*) features a circular photo-portrait of Gardner Q. Colton (1814 to 1898, *right*). A medical school dropout who popularized nitrous-oxide anesthesia for dental extraction, Colton was photographed no longer sporting the Lincoln-esque beard from 1863, when his namesake Colton Dental Association was founded in Manhattan. Rather, Colton now has the beardless but moustached look popularized in the mid-1870s by writer Mark Twain and his contemporaries. Having styled himself with an honorific doctorate, “Dr. Colton” boasts that he “originated the use of Nitrous Oxide Gas for extracting teeth without pain, and during the past 13 years have administered [it] to **OVER 90,000 PATIENTS**, without one accident from its effects.” Because his namesake association was founded in 1863, this trade card (from the Wood Library-Museum’s Ben Z. Swanson Collection) can be dated reliably to the year 1876 or soon after. (Copyright © the American Society of Anesthesiologists’ Wood Library-Museum of Anesthesiology.)

George S. Bause, M.D., M.P.H., *Honorary Curator and Laureate of the History of Anesthesia*, Wood Library-Museum of Anesthesiology, Schaumburg, Illinois, and *Clinical Associate Professor*, Case Western Reserve University, Cleveland, Ohio. [UJYC@aol.com](mailto:UJYC@aol.com).
